# Supplementary material for: Single-nucleus RNA sequencing of human periventricular white matter in vascular dementia
Source: PubMed Central journal article supplement — bioRxiv. 2024 Dec 10:2024.12.06.627202. Preprint. [Version 1] doi: 10.1101/2024.12.06.627202 (PMC11661092; doi:10.1101/2024.12.06.627202), 2024-12-10
Supplement: NIHPP2024.12.06.627202v1-supplement-1.pdf [file NIHPP2024.12.06.627202v1-supplement-1.pdf]

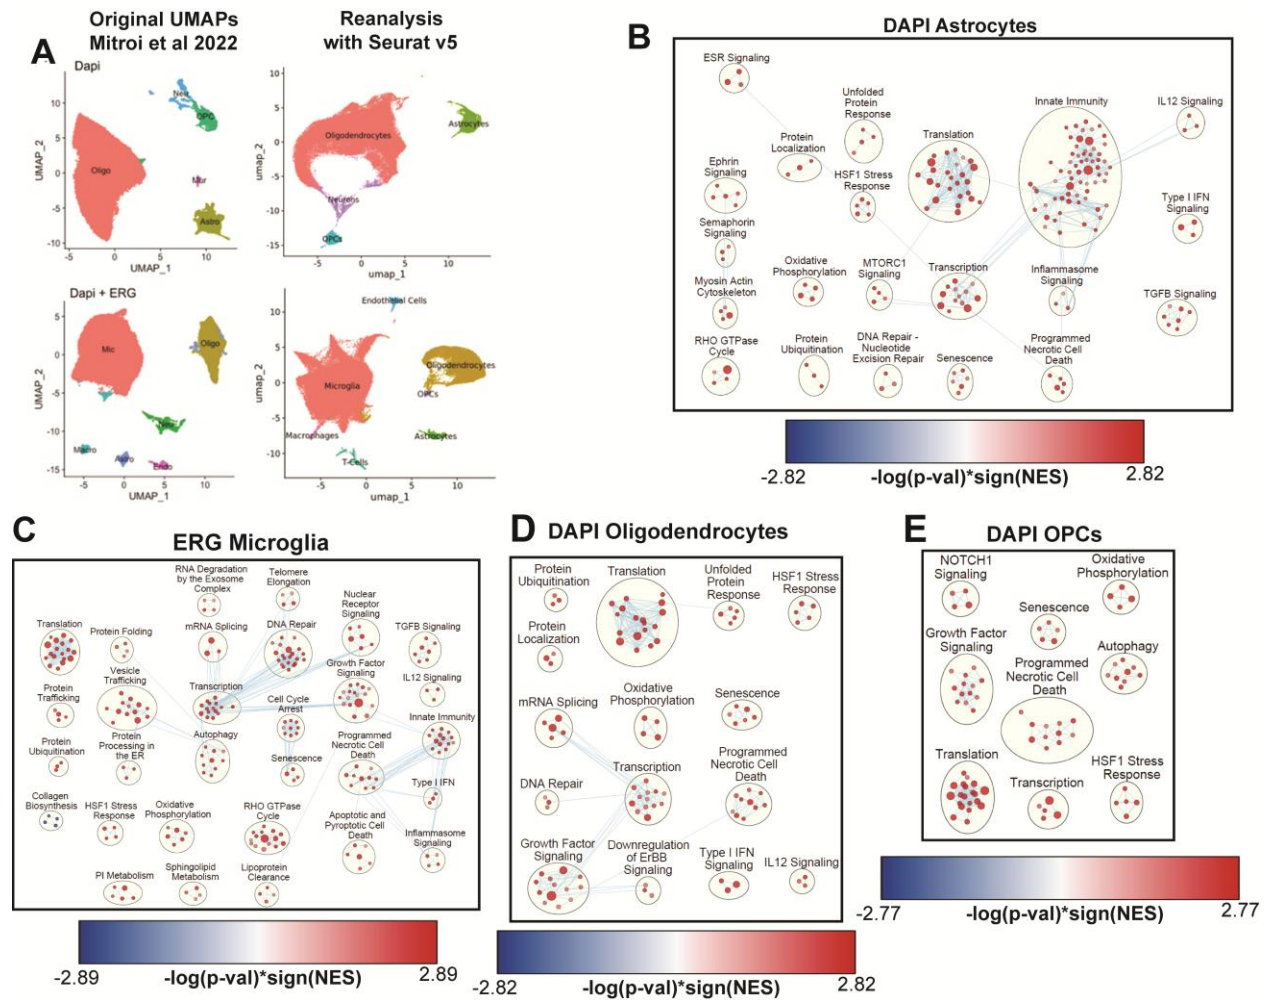

**Figure S1 GSEA Analysis of Mitroi et al VaD datasets (A)** Side by side comparison of Mitroi et al UMAPs from original publication (left) and after reanalysis with our Seurat v5 pipeline (right). **(B-D)** Cytoscape EnrichmentMap showing individual GSEA hits from Reactome (FDR < 0.05) clustered via AutoAnnotate.

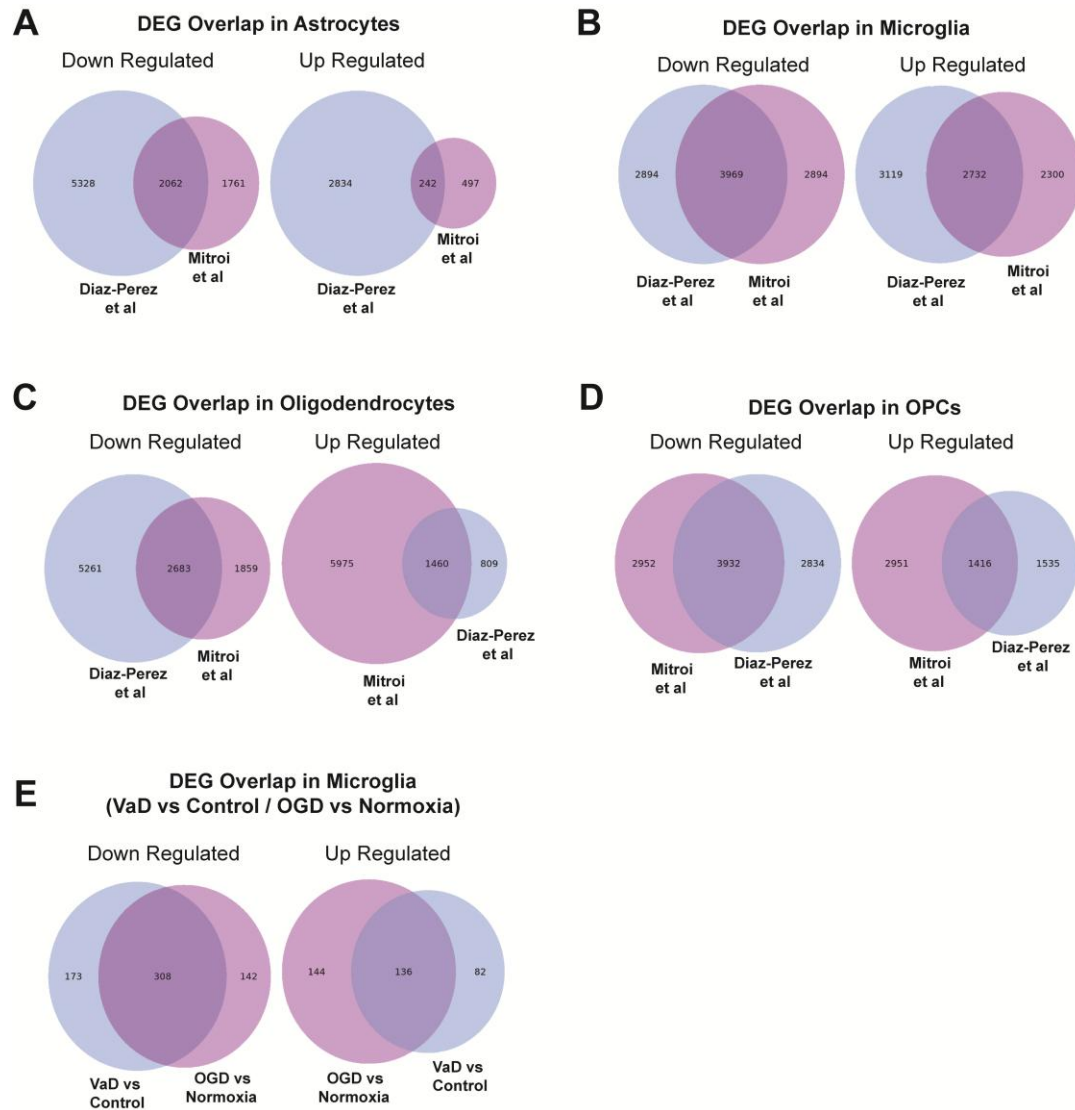

**Figure S2 Overlapping genes identified by RRHO in comparisons between transcriptomic datasets** Venn diagrams showing overlap of pre-ranked gene lists (VaD vs Control) from (A) astrocytes, (B) microglia, (C) oligodendrocytes and (D) OPCs from our dataset (*Diaz-Perez et al*) and the *Mitroi et al* dataset. Venn diagram showing overlap of preranked gene lists between microglia from VaD vs Control and OGD vs Normoxia.

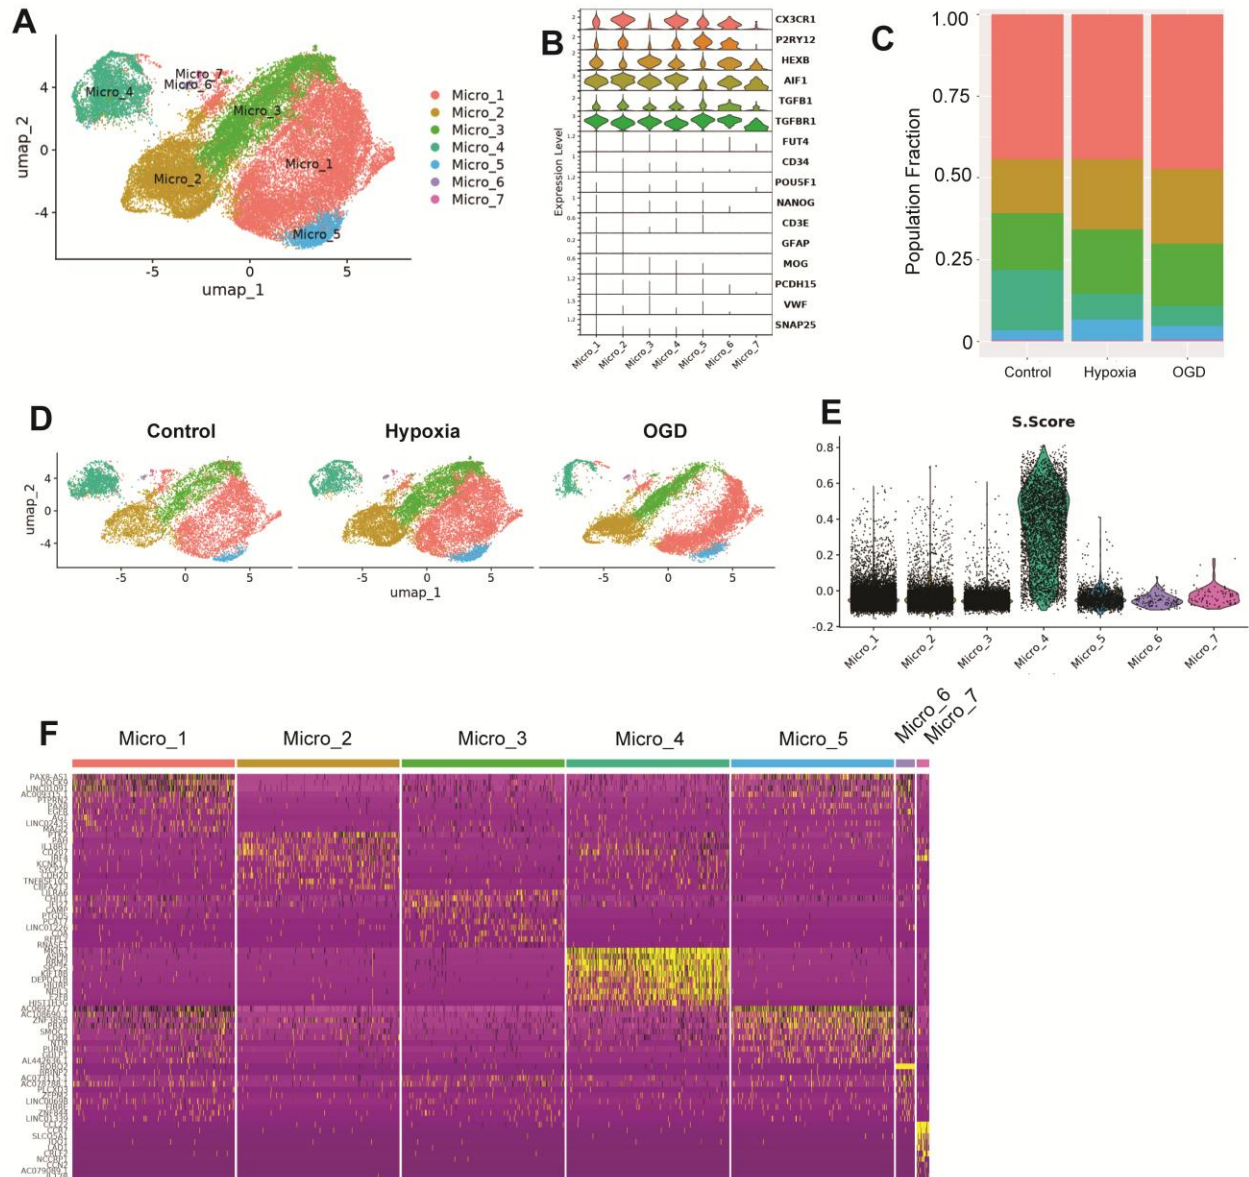

**Figure S3 Single cell landscape of iMGL (A)** UMAP of iMGL dataset. **(B)** Violin plot of multiple microglia-specific, iPSC-specific and other CNS cell type-specific markers in iMGL dataset. **(C)** Cluster proportions split by normoxia, hypoxia and OGD. **(D)** UMAP of iMGL dataset split by normoxia, hypoxia and OGD. **(E)** Module scoring of each cluster using cell cycle genes. **(F)** Heatmap of top 10 markers that distinguish each cluster from all other cells in our dataset.

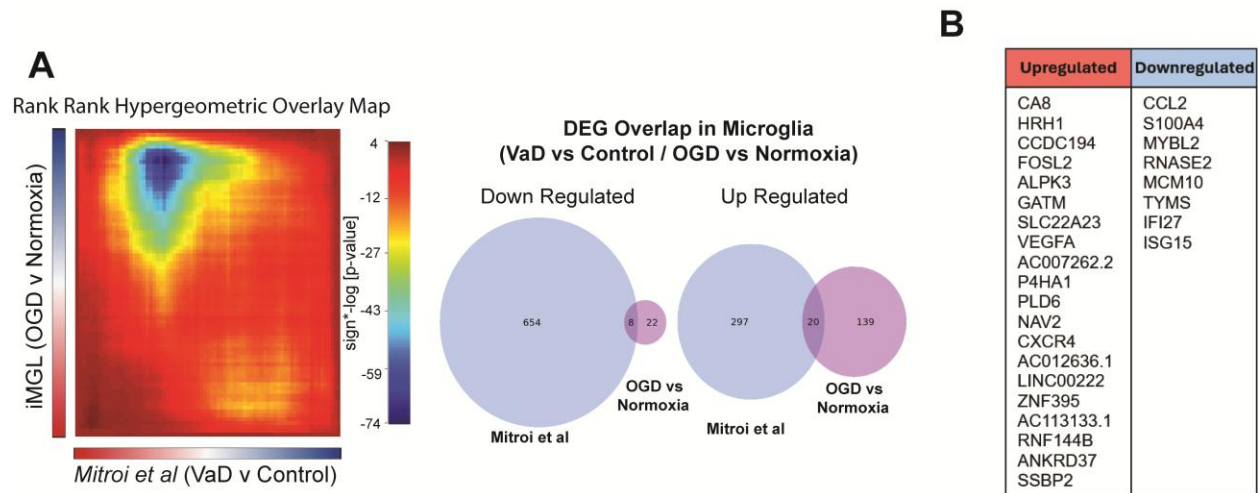

**Figure S4 Anticorrelation of OGD-exposed iMGL and *Mitroi et al* dataset (A)** RRHO heatmap and Venn diagrams showing overlap of pre-ranked gene lists from *Mitroi et al* (VaD vs Control) and iMGL (OGD vs Normoxia) datasets. Negative values on the  $-\log(p\text{-value})$  scale is indicative of an almost perfect anti-correlation between the lists of differentially expressed genes from *Mitroi et al* and iMGL. **(B)** List of overlapping upregulated and downregulated genes between *Mitroi et al* and iMGL (no significant hits found on Reactome).

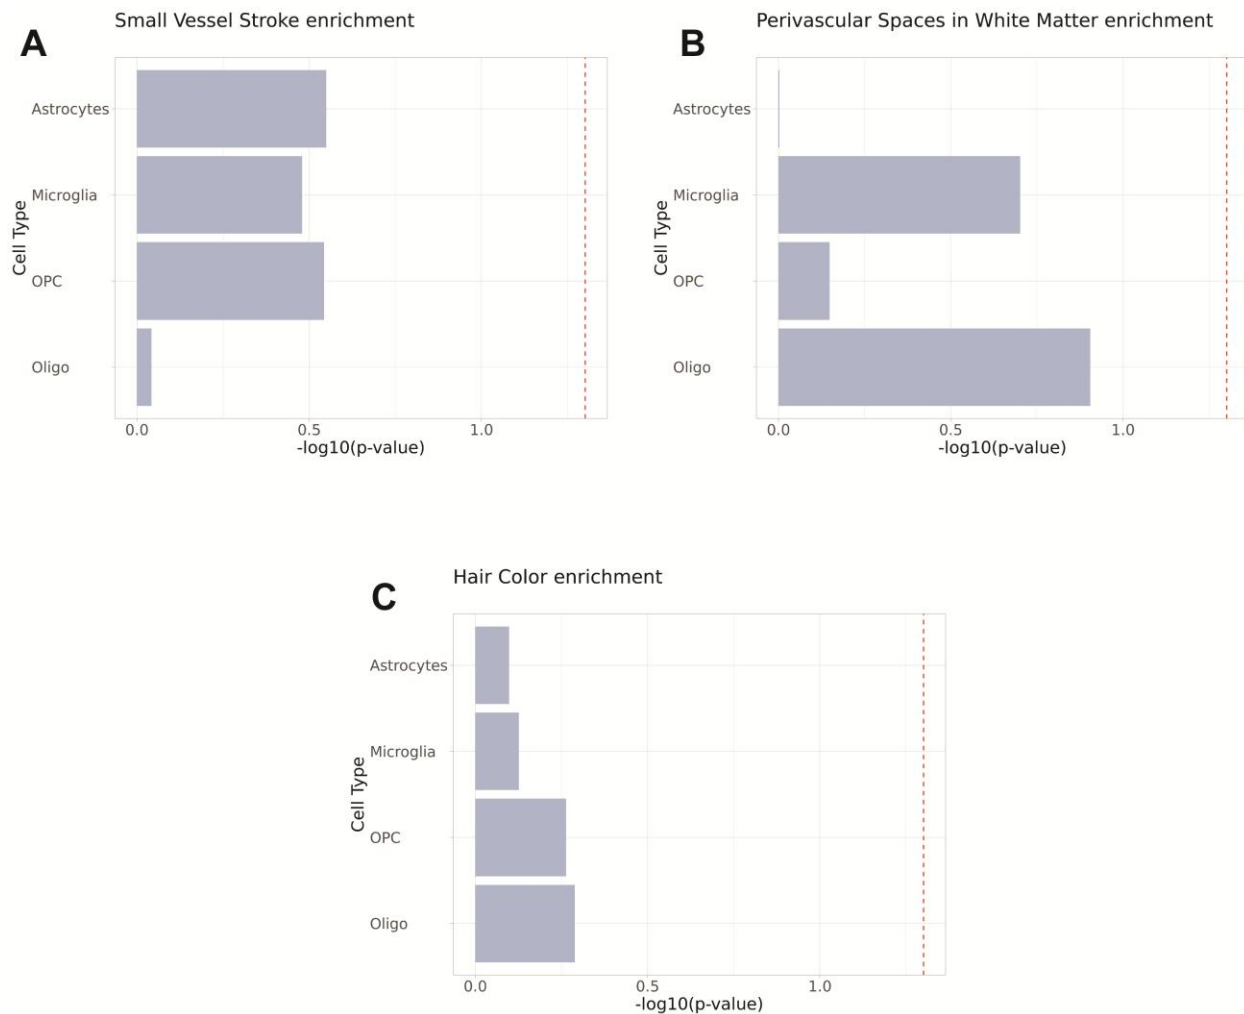

**Figure S5 Additional gene-set analysis of GWAS data using MAGMA** Association of cell type transcriptomes in VaD with known genetic risk variants linked to (A) small vessel stroke, (B) enlarged perivascular space and (C) hair color (negative control). The red lines represent the p-value threshold of 0.05, indicating statistically significant associations.

**Supplemental Table 1. Demographic and histopathological information of periventricular white matter samples**

| Summarizes the demographic, diagnostic and histopathological information linked to each sample used to generate our single-nucleus RNA sequencing dataset. |       |                 |            |         |     |        |                  |                                                                                                                                                                          |                                      |         |          |     |
|------------------------------------------------------------------------------------------------------------------------------------------------------------|-------|-----------------|------------|---------|-----|--------|------------------|--------------------------------------------------------------------------------------------------------------------------------------------------------------------------|--------------------------------------|---------|----------|-----|
| Sample Name                                                                                                                                                | Batch | NeuroBioBank ID | Brain Bank | Race    | Age | Sex    | Cause of Death   | Vascular Pathology                                                                                                                                                       | Braak & Braak Staging                | CAA     | PMI (hr) | RIN |
| Control1                                                                                                                                                   | 1     | S13788          | Harvard    | White   | 100 | Male   | Natural          | Mild cSVD with remote microinfarcts                                                                                                                                      | Stage II                             | No      | 6.17     | 7.1 |
| Control2                                                                                                                                                   | 2     | S10213          | Harvard    | White   | 86  | Female | Natural          | Mild cSVD with remote microinfarcts                                                                                                                                      | Stage I                              | No      | 6.92     | 2.3 |
| Control4F                                                                                                                                                  | 4     | S18110          | Harvard    | White   | 66  | Female | Undetermined     | No infarcts or vascular pathology detected.                                                                                                                              | No neurofibrillary tangles observed. | No      | 7.42     | 2.8 |
| Control5                                                                                                                                                   | 5     | S07749          | Harvard    | Unknown | 61  | Male   | Undetermined     | Arteriosclerosis. Mild edema in cerebral white matter.                                                                                                                   | Stage I                              | No      | 10.08    | n/a |
| VaD1                                                                                                                                                       | 1     | 197965          | Mt. Sinai  | White   | 98  | Female | Bronchopneumonia | Multiple transient ischemic attacks. Extensive cSVD with white matter changes. Large healed cystic infarct from 12 yrs earlier. Area affected was far from sampling area | No neurofibrillary tangles observed. | Unknown | 1.83     | 6.7 |
| VaD2                                                                                                                                                       | 2     | BEB19028        | U Miami    | White   | 83  | Male   | Natural          | Hypertensive small vessel disease with non-specific white matter gliosis.                                                                                                | Stage II                             | No      | 28.24    | 8.9 |
| VaD3F                                                                                                                                                      | 3     | S02794          | Harvard    | White   | 83  | Female | Natural          | Extensive cSVD with several microinfarcts in occipital cortex, parietal cortex, anterior commissure, hippocampus and thalamus                                            | Stage I                              | No      | 30       | 5.9 |
| VaD5                                                                                                                                                       | 5     | S02918          | Harvard    | White   | 74  | Male   | Undetermined     | Atherosclerosis, arteriosclerosis. Small infarct in left internal capsule (related to prefrontal cortex) and gray matter in pons                                         | Stage I                              | Yes     | 13.58    | 3.1 |

**Supplemental Table 2. Quality Control metrics of sequenced snRNAseq samples**

| Summarizes the quality control parameters obtained from each sample post-sequencing, after Cell Ranger alignment and after implementing initial QC cutoffs in Seurat v5. |        |              |             |                           |                      |                           |                     |               |               |                |            |
|--------------------------------------------------------------------------------------------------------------------------------------------------------------------------|--------|--------------|-------------|---------------------------|----------------------|---------------------------|---------------------|---------------|---------------|----------------|------------|
| Name                                                                                                                                                                     | Ave bp | CDNA (ng/uL) | # of Nuclei | Post-Sequencing Alignment |                      |                           | Dataset Integration |               |               |                |            |
|                                                                                                                                                                          |        |              |             | Median Genes per Cell     | Total Genes Detected | % Mapped to Transcriptome | Average of MT %     | Range of MT % | Pre-Filtering | Post-Filtering | % Filtered |
| Control1                                                                                                                                                                 | 457    | 1.48         | 5,143       | 2,875                     | 29,657               | 69.90%                    | 0.80%               | 0% - 23.09%   | 5143          | 4937           | 4.01%      |
| Control2                                                                                                                                                                 | 515    | 8.61         | 3,320       | 1,826                     | 27,139               | 62.20%                    | 0.28%               | 0% - 23.11%   | 3320          | 3260           | 1.81%      |
| Control4F                                                                                                                                                                | 442    | 8.61         | 6,691       | 2,931                     | 30,872               | 70.70%                    | 1.33%               | 0% - 48.44%   | 6691          | 6420           | 4.05%      |
| Control5                                                                                                                                                                 | 469    | 5.07         | 2,023       | 2,159                     | 26,029               | 36.50%                    | 0.79%               | 0% - 10.06%   | 2023          | 1842           | 8.95%      |
| VaD1                                                                                                                                                                     | 460    | 2.22         | 5,795       | 2,894                     | 30,179               | 72.10%                    | 1.73%               | 0% - 56.07%   | 5795          | 5476           | 5.50%      |
| VaD2                                                                                                                                                                     | 493    | 22.5         | 4,784       | 2,288                     | 29,355               | 78.00%                    | 0.38%               | 0% - 35.46%   | 4784          | 4374           | 8.57%      |
| VaD3F                                                                                                                                                                    | 464    | 3.14         | 3,287       | 2,556                     | 30,601               | 67.30%                    | 1.58%               | 0% - 74.16%   | 3287          | 2670           | 18.77%     |
| VaD5                                                                                                                                                                     | 469    | 4.69         | 5,313       | 2,457                     | 28,741               | 63.00%                    | 0.57%               | 0% - 39.09%   | 5310          | 5177           | 2.50%      |

**Supplemental Table 3. Total number of nuclei contributed by sample**

Shows the count of nuclei obtained from each cluster by sample of origin after quality control filtering.

| Cluster Annotation       | Control1 | Control2 | Control4 | Control5 | VAD1 | VAD2 | VAD3 | VAD5 |
|--------------------------|----------|----------|----------|----------|------|------|------|------|
| <b>Oligo_1</b>           | 2511     | 1835     | 2677     | 756      | 3260 | 2283 | 890  | 2522 |
| <b>Oligo_2</b>           | 1546     | 1024     | 2010     | 477      | 1344 | 1361 | 591  | 1392 |
| <b>Astrocytes</b>        | 162      | 115      | 771      | 170      | 390  | 250  | 292  | 482  |
| <b>Microglia</b>         | 364      | 64       | 543      | 60       | 203  | 225  | 155  | 341  |
| <b>OPCs</b>              | 107      | 157      | 222      | 173      | 129  | 106  | 231  | 330  |
| <b>Neurons</b>           | 161      | 33       | 135      | 164      | 40   | 122  | 423  | 44   |
| <b>Oligo_3</b>           | 79       | 21       | 30       | 40       | 97   | 24   | 33   | 41   |
| <b>Endothelial Cells</b> | 7        | 11       | 32       | 2        | 13   | 3    | 55   | 25   |



**Supplemental Table 4. Correlation of heat shock protein gene expression with post-mortem interval**

Shows the Pearson correlation coefficient (R), p-value and adjusted p-value of each gene's expression in relation to increasing post-mortem interval. Comparisons were done with averaged gene expression from whole dataset or by celltype. Adjusted p-value was obtained using the Bonferroni correction.

| Genes    | Whole Dataset |       |           | Astrocytes |       |           | Microglia |          |           | Oligodendrocytes |       |           | OPCs  |       |           |
|----------|---------------|-------|-----------|------------|-------|-----------|-----------|----------|-----------|------------------|-------|-----------|-------|-------|-----------|
|          | R             | p-val | adj p-val | R          | p-val | adj p-val | R         | p-val    | adj p-val | R                | p-val | adj p-val | R     | p-val | adj p-val |
| HSPB1    | 0.54          | 0.16  | 1.00      | 0.58       | 0.13  | 1.00      | 0.23      | 0.58     | 1.00      | 0.47             | 0.24  | 1.00      | 0.46  | 0.25  | 1.00      |
| HSP90AA1 | 0.46          | 0.26  | 1.00      | 0.27       | 0.51  | 1.00      | -0.02     | 0.97     | 1.00      | 0.55             | 0.16  | 1.00      | 0.72  | 0.05  | 0.95      |
| HSP90AB1 | 0.38          | 0.36  | 1.00      | 0.51       | 0.20  | 1.00      | -0.05     | 0.91     | 1.00      | 0.39             | 0.33  | 1.00      | 0.52  | 0.18  | 1.00      |
| DNAJB6   | 0.53          | 0.17  | 1.00      | 0.70       | 0.05  | 0.95      | 0.37      | 0.36     | 1.00      | 0.57             | 0.14  | 1.00      | 0.29  | 0.48  | 1.00      |
| DNAJB1   | 0.59          | 0.13  | 1.00      | 0.67       | 0.07  | 1.00      | -0.10     | 0.81     | 1.00      | 0.64             | 0.09  | 1.00      | 0.49  | 0.21  | 1.00      |
| PTGES3   | 0.49          | 0.021 | 0.399     | 0.65       | 0.08  | 1.00      | 0.39      | 0.34     | 1.00      | 0.54             | 0.16  | 1.00      | 0.58  | 0.13  | 1.00      |
| HSPH1    | 0.54          | 0.17  | 1.00      | 0.55       | 0.16  | 1.00      | 0.23      | 0.59     | 1.00      | 0.58             | 0.14  | 1.00      | 0.63  | 0.09  | 1.00      |
| CREBBP   | -0.099        | 0.82  | 1.00      | 0.43       | 0.29  | 1.00      | -0.23     | 0.58     | 1.00      | 0.02             | 0.96  | 1.00      | -0.02 | 0.96  | 1.00      |
| DEDD2    | 0.52          | 0.19  | 1.00      | 0.41       | 0.31  | 1.00      | 0.09      | 0.83     | 1.00      | 0.54             | 0.17  | 1.00      | 0.69  | 0.06  | 1.00      |
| HSPA1A   | 0.66          | 0.073 | 1.00      | 0.01       | 0.98  | 1.00      | 0.70      | 0.06     | 1.00      | 0.68             | 0.06  | 1.00      | 0.72  | 0.04  | 0.76      |
| UBB      | 0.36          | 0.38  | 1.00      | 0.67       | 0.07  | 1.00      | 0.88      | 3.59E-03 | 6.80E-02  | 0.36             | 0.38  | 1.00      | 0.79  | 0.02  | 0.38      |
| SERPINH1 | 0.46          | 0.25  | 1.00      | 0.66       | 0.08  | 1.00      | -0.22     | 0.60     | 1.00      | 0.53             | 0.18  | 1.00      | 0.27  | 0.51  | 1.00      |
| MRPL18   | 0.47          | 0.24  | 1.00      | 0.62       | 0.10  | 1.00      | -0.03     | 0.94     | 1.00      | 0.50             | 0.21  | 1.00      | 0.55  | 0.15  | 1.00      |
| RP3      | -0.17         | 0.7   | 1.00      | -0.44      | 0.27  | 1.00      | -0.35     | 0.39     | 1.00      | -0.14            | 0.75  | 1.00      | 0.56  | 0.15  | 1.00      |
| CRYAB    | 0.57          | 0.14  | 1.00      | 0.80       | 0.02  | 0.38      | 0.43      | 0.28     | 1.00      | 0.59             | 0.12  | 1.00      | 0.48  | 0.23  | 1.00      |
| CAMK2G   | 0.34          | 0.18  | 1.00      | 0.69       | 0.06  | 1.00      | 0.61      | 0.11     | 1.00      | 0.45             | 0.26  | 1.00      | 0.66  | 0.07  | 1.00      |
| CAMK2G   | 0.34          | 0.4   | 1.00      | -0.03      | 0.95  | 1.00      | 0.45      | 0.26     | 1.00      | 0.71             | 0.05  | 0.95      | 0.81  | 0.02  | 0.38      |
| MTOR     | 0.15          | 0.73  | 1.00      | -0.17      | 0.69  | 1.00      | -0.46     | 0.25     | 1.00      | 0.43             | 0.29  | 1.00      | -0.03 | 0.94  | 1.00      |
| HSPB8    | 0.15          | 0.73  | 1.00      | 0.06       | 0.89  | 1.00      | 0.30      | 0.47     | 1.00      | 0.65             | 0.08  | 1.00      | -0.03 | 0.94  | 1.00      |

Supplemental Table 5. Summary of characteristics for the GWAS used in MAGMA

| Shows the key characteristics and summary of statistics for the GWAS studies incorporated into our MAGMA analysis: |                                                                                                     |                    |                                                    |             |                                                          |                     |                       |                                                   |                                                               |  |
|--------------------------------------------------------------------------------------------------------------------|-----------------------------------------------------------------------------------------------------|--------------------|----------------------------------------------------|-------------|----------------------------------------------------------|---------------------|-----------------------|---------------------------------------------------|---------------------------------------------------------------|--|
| Phenotype                                                                                                          | Citation                                                                                            | Groups Compared    | Recruitment                                        | Cohort Size | Age                                                      | Sex                 | Ethnicity             | Genotype Method                                   | Significant Loci (genes)                                      |  |
| White Matter Hypertensities (WMH)                                                                                  | <a href="https://doi.org/10.1038/s41467-020-19111-2">https://doi.org/10.1038/s41467-020-19111-2</a> | Quantitative Trait | CHARGE Consortium (24, 182) & UK Biobank (26, 788) | 50,970      | 66.0 ± 7.5 y.o.                                          | 47% M / 53% F       | European (>95% White) | Several<br>Applied Biosystems UK<br>Biobank Axiom | TRIM65, EFEMP1, NMT1, VCAN, NID2, KCN2, ECHDC3, XKR6          |  |
| Fractional Anisotropy (FA)                                                                                         | <a href="https://doi.org/10.1038/s41467-020-15932-3">https://doi.org/10.1038/s41467-020-15932-3</a> | Quantitative Trait | UK Biobank                                         | 17,663      | 63.3 ± 7.4 y.o.                                          | 47.3% M / 52.7% F   | European (>94% White) | Several<br>Applied Biosystems UK<br>Biobank Axiom | VCAN, SPIRE2, TCF25, ZFP57, HBEGF, ICAL1, WDR12, CARF, NBEAL1 |  |
| Small Vessel Stroke (SVS)                                                                                          | <a href="https://doi.org/10.1038/s41598-022-05165-3">https://doi.org/10.1038/s41598-022-05165-3</a> | Case Control       | Meta-analysis of 29 cohorts                        | 13,620      | See supplemental Tables 1 and 2 in Mishra et al 2022     |                     |                       | Several                                           | PMF1, ZCCHC14, PRDM16, COL4A2, HTRA1, PTCH1                   |  |
| Enlarged Perivascular Spaces (PVS)                                                                                 | <a href="https://doi.org/10.1038/s41591-023-02268-w">https://doi.org/10.1038/s41591-023-02268-w</a> | Quantitative Trait | Meta-analysis of 18 cohorts                        | 40,095      | 66.3 ± 8.6 y.o.                                          | 39% M / 61% F       | European (>96% White) | Several                                           | SLC13A3, WNT7A, ITGB5, GFAP, OP41, EFEMP1, LPAR1, LAMC1       |  |
| Alzheimer's Disease (AD)                                                                                           | <a href="https://doi.org/10.1038/s41588-022-01024-2">https://doi.org/10.1038/s41588-022-01024-2</a> | Case Control       | Meta-analysis of 12 cohorts                        | 487,511     | See supplemental Tables 1 and 2 in Bellenguez et al 2022 |                     |                       | Several                                           | SORT1, ADAM17, NCK2, ICATL, TNIP1, CTSB, TSPAN14, CTSH        |  |
| Intracerebral Hemorrhage (ICH)                                                                                     | <a href="https://doi.org/10.1016/j.ahj.2014.02.012">https://doi.org/10.1016/j.ahj.2014.02.012</a>   | Case Control       | Meta-analysis of 6 cohorts                         | 6,968       | See table 1 in Woo et al 2014                            |                     |                       | Several                                           | TRHD, PMF1, SLC25A44                                          |  |
| Hair Color                                                                                                         | <a href="https://doi.org/10.1038/s41588-021-00954-4">https://doi.org/10.1038/s41588-021-00954-4</a> | Case Control       | UK Biobank                                         | 456,348     | 56.52 ± 8.09 y.o.                                        | 45.79% M / 54.21% F | European (>94% White) | Applied Biosystems UK<br>Biobank Axiom            | MCR1, ASIP, HERC2, OCA2, PKHD1, TSPAN10                       |  |
